# Supplementary material for: Survival Following Edge‐to‐Edge Transcatheter Mitral Valve Repair in Patients With Cardiogenic Shock: A Nationwide Analysis
Source: PubMed Central journal article supplement — J Am Heart Assoc. 2021 Apr 6;10(8):e019882. doi: 10.1161/JAHA.120.019882 (PMC8174169; doi:10.1161/jaha.120.019882), 2021-04-06

# **SUPPLEMENTAL MATERIAL**

**Table S1. Clinical Classification Software (CCS) categories for cardiogenic shock developed through the Healthcare Cost and Utilization Project (HCUP).<sup>19, 20</sup>**

| CCS Categories | Description                                                                 | ICD-9-CM                                                                                                                                                                                                                                                                                                                                                                                                                                | ICD-10-CM                                                                                                                                                                                                                                                                                                                                                                                                |
|----------------|-----------------------------------------------------------------------------|-----------------------------------------------------------------------------------------------------------------------------------------------------------------------------------------------------------------------------------------------------------------------------------------------------------------------------------------------------------------------------------------------------------------------------------------|----------------------------------------------------------------------------------------------------------------------------------------------------------------------------------------------------------------------------------------------------------------------------------------------------------------------------------------------------------------------------------------------------------|
| 97             | Pericarditis, endocarditis, and myocarditis; cardiomyopathy (no TB or STDs) | 032.82, 036.40, 036.41, 036.42, 036.43, 074.20, 074.21, 074.22, 074.23, 112.81, 115.03, 115.04, 115.13, 115.14, 115.93, 115.94, 130.3, 391.0, 391.1, 391.2, 391.8, 391.9, 392.0, 393, 398.0, 398.90, 398.99, 420.0, 420.90, 420.91, 420.99, 421.0, 421.1, 421.9, 422.0, 422.90, 422.91, 422.92, 422.93, 422.99, 423.0, 423.1, 423.2, 423.3, 423.8, 423.9, 425.0, 425.1, 425.11, 425.18, 425.2, 425.3, 425.4, 425.7, 425.8, 425.9, 429.0 | A36.81, A38.1, A39.50, A39.51, A39.52, A39.53, B26.82, B33.20, B33.21, B33.22, B33.23, B33.24, B37.6, B58.81, I01.0, I01.1, I01.2, I01.8, I01.9, I02.0, I09.0, I09.2, I09.9, I23.0, I30.0, I30.1, I30.8, I30.9, I31.0, I31.1, I31.2, I31.3, I31.4, I31.8, I31.9, I32, I33.0, I33.9, I38, I39, I40.0, I40.1, I40.8, I40.9, I41, I42.0, I42.1, I42.2, I42.3, I42.4, I42.5, I42.7, I42.8, I42.9, I43, I51.4 |
| 100            | Acute myocardial infarction                                                 | 410.0, 410.00, 410.01, 410.02, 410.1, 410.10, 410.11, 410.12, 410.2, 410.20, 410.21, 410.22, 410.3, 410.30, 410.31, 410.32, 410.4, 410.40, 410.41, 410.42, 410.5, 410.50, 410.51, 410.52, 410.6, 410.60, 410.61, 410.62, 410.7, 410.70, 410.71, 410.72, 410.8, 410.80, 410.81, 410.82, 410.9, 410.90, 410.91, 410.92                                                                                                                    | I21.01, I21.02, I21.09, I21.11, I21.19, I21.21, I21.29, I21.3, I21.4, I22.0, I22.1, I22.2, I22.8, I22.9, I21.9, I21.A1, I21.A9                                                                                                                                                                                                                                                                           |
| 101            | Coronary atherosclerosis and other heart disease                            | 411.0, 411.1, 411.8, 411.81, 411.89, 412, 413.0, 413.1, 413.9, 414.0, 414.00, 414.01, 414.06, 414.2, 414.3, 414.4, 414.8, 414.9, V45.81, V45.82                                                                                                                                                                                                                                                                                         | I20.0, I20.1, I20.8, I20.9, I23.7, I24.0, I24.1, I24.8, I24.9, I25.10, I25.110, I25.111, I25.118, I25.119, I25.2, I25.5,                                                                                                                                                                                                                                                                                 |

|     |                                                |                                                                                                                                   |                                                                                                                                                                                                               |
|-----|------------------------------------------------|-----------------------------------------------------------------------------------------------------------------------------------|---------------------------------------------------------------------------------------------------------------------------------------------------------------------------------------------------------------|
|     |                                                |                                                                                                                                   | I25.6, I25.750, I25.751, I25.758, I25.759,<br>I25.811, I25.82, I25.83, I25.84, I25.89,<br>I25.9, Z95.1, Z95.5, Z98.61                                                                                         |
| 103 | Pulmonary heart disease                        | 415.0, 415.1, 415.12, 415.13, 415.19, 416.0, 416.1,<br>416.2, 416.8, 416.9, 417.0, 417.1, 417.8, 417.9,<br>V12.55                 | I26.01, I26.02, I26.09, I26.90, I26.92,<br>I26.99, I27.0, I27.1, I27.2, I27.81, I27.82,<br>I27.89, I27.9, I28.0, I28.1, I28.8, I28.9,<br>Z86.711, I27.20, I27.21, I27.22, I27.23,<br>I27.24, I27.29, I27.83   |
| 106 | Cardiac dysrhythmias                           | 427.0, 427.1, 427.2, 427.31, 427.32, 427.60,<br>427.61, 427.69, 427.81, 427.89, 427.9, 785.0,<br>785.1                            | I47.0, I47.1, I47.2, I47.9, I48.0, I48.1,<br>I48.2, I48.3, I48.4, I48.91, I48.92, I49.1,<br>I49.2, I49.3, I49.40, I49.49, I49.5, I49.8,<br>I49.9, R00.0, R00.1, R00.2                                         |
| 107 | Cardiac arrest and<br>ventricular fibrillation | 427.41, 427.42, 427.5                                                                                                             | I46.2, I46.8, I46.9, I49.01, I49.02                                                                                                                                                                           |
| 108 | Congestive heart failure;<br>non-hypertensive  | 398.91, 428.0, 428.1, 428.20, 428.21, 428.22,<br>428.23, 428.30, 428.31, 428.32, 428.33, 428.40,<br>428.41, 428.42, 428.43, 428.9 | I09.81, I50.1, I50.20, I50.21, I50.22,<br>I50.23, I50.30, I50.31, I50.32, I50.33,<br>I50.40, I50.41, I50.42, I50.43, I50.9,<br>I50.810, I50.811, I50.812, I50.813,<br>I50.814, I50.82, I50.83, I50.84, I50.89 |

HCUP CCS, Healthcare Cost and Utilization Project (HCUP). December 2009, U.S. Agency for Healthcare Research and Quality, Rockville, MD, USA.

**Table S2. Diagnosis and Procedure Codes used to define index event, baseline characteristics and interventions.**

| <b>Diagnosis Codes</b>            |                                                                                                                                                                                        |                                                                                                                                   |
|-----------------------------------|----------------------------------------------------------------------------------------------------------------------------------------------------------------------------------------|-----------------------------------------------------------------------------------------------------------------------------------|
| <b>Conditions</b>                 | <b>ICD-9-CM</b>                                                                                                                                                                        | <b>ICD-10-CM</b>                                                                                                                  |
| Cardiogenic shock                 | 785.51                                                                                                                                                                                 | R57.0                                                                                                                             |
| Heart failure (Primary diagnosis) | 402.01, 402.11, 402.91, 404.01, 404.11, 404.91, 404.03, 404.13, 404.93, 428, 428.9, 428.1, 428.2, 428.21, 428.22, 428.23, 428.3, 428.31, 428.32, 428.33, 428.4, 428.41, 428.42, 428.43 | I11.0, I13.0, I13.2, I50.9, I50.1, I50.20, I50.21, I50.22, I50.23, I50.30, I50.31, I50.32, I50.33, I50.40, I50.41, I50.42, I50.43 |
| Mitral Valve Disease              | 424.0                                                                                                                                                                                  | I34.0, I34.1, I34.2, I34.8, I34.9                                                                                                 |
| Hypertension                      | 401.x, 402.x–405.x                                                                                                                                                                     | I10.x, I11.x–I13.x, I15.x, O10.x, O11.x, O16.x                                                                                    |
| Chronic Heart Failure             | 398.91, 402.01, 402.11, 402.91, 404.01, 404.03, 404.11, 404.13, 404.91, 404.93, 425.4–425.9, 428.x                                                                                     | I09.9, I11.0, I13.0, I13.2, I25.5, I42.0, I42.5- I42.9, I43.x, I50.x, P29.0                                                       |
| Atrial Fibrillation/Flutter       | 427.31, 427.32                                                                                                                                                                         | I48.0, I48.1, I48.2, I48.3, I48.4, I48.91, I48.92                                                                                 |
| Renal Failure                     | 403.01, 403.11, 403.91, 404.02, 404.03, 404.12, 404.13, 404.92, 404.93, 585.x, 586.x, 588.0, V42.0, V45.1, V56.x                                                                       | N18.x, N19.x, Z49.0x, Z49.3x, Z91.15, Z94.0, Z99.2                                                                                |
| Pulmonary Disease                 | 490 -496, 500-505, 506.4                                                                                                                                                               | J40.x–J47.x, J60.x–J67.x, J68.4                                                                                                   |
| Myocardial Infarction             | 410.xx, 411.1, 412                                                                                                                                                                     | I20.0, I21.x, I22.x, I25.110, I25.2, I25.7x                                                                                       |

|                                                           |                                                                         |                                                                                                        |
|-----------------------------------------------------------|-------------------------------------------------------------------------|--------------------------------------------------------------------------------------------------------|
| Peripheral Vascular Disorder                              | 093.0, 437.3, 440.x, 441.x, 443.1–<br>443.9, 447.1, 557.1, 557.9, V43.4 | I70.x, I71.x, I72.x, I73.1, I73.8, I73.9, I77.1,<br>I79.0, I79.1, I79.8, K55.1, K55.8, K55.9,<br>Z95.8 |
| Concomitant Valvular Disease<br>(Tricuspid and/or Aortic) | 424.1, 424.2                                                            | I35.0, I35.1, I35.2, I35.8, I35.9, I36.0, I36.1,<br>I36.2, I36.8, I36.9                                |
| Cerebral Vascular Disease                                 | 362.34, 430.x - 438.x                                                   | G45.x, G46.x, H34.0, I60.x - I69.x                                                                     |
| Ventricular Tachycardia/Fibrillation                      | 427.0, 427.1, 427.2, 427.41, 427.42                                     | I47.0, I47.2, I47.9, I49.01, I49.02, I49.2                                                             |
| <b>Procedure Codes</b>                                    |                                                                         |                                                                                                        |
| <b>Procedure</b>                                          | <b>ICD-9-PCS</b>                                                        | <b>ICD-10-PCS</b>                                                                                      |
| MitraClip                                                 | 35.97                                                                   | 02UG3JZ                                                                                                |
| Heart Transplant                                          | 37.51                                                                   | 02YA0Z[0/1/2]                                                                                          |
| LVAD                                                      | 37.66                                                                   | 02HA0QZ                                                                                                |
| Mitral Valve Interventions                                | 35.02, 35.12, 35.23, 35.24, 35.97                                       | 02QGxxx, 02UGxxx, 02RGxxx, 027Gxxx,<br>02NGxxx, 02CGxxx, 02VGxxx                                       |
| Circulatory Support<br>(IABP/Impella/ECMO)                | 37.61, 37.68, 39.65                                                     | 5A02[1/2]10, 5A1522[3/F/G/H],<br>5A021[1/2][6/D]                                                       |
| Mechanical Ventilation                                    | 96.70, 96.71, 96.72                                                     | 5A19[3/4/5]5Z                                                                                          |
| Coronary Interventions (PCI/CABG)                         | 36.07, 36.06, 00.66, 36.1x                                              | 027[0-3]x[4-7]x, 027[0-3]x[D-G]x, 027[0-<br>3]xZx, 021[0-3][0/4]xx                                     |
| Hemodialysis                                              | 39.95                                                                   | 5A1D[0/6/7-9]0Z                                                                                        |

CABG=coronary artery bypass graft; ECMO=extracorporeal membrane oxygen; IABP=intraortic balloon pump; ICD=International Classification of Diseases; LVAD=Left Ventricular Assist Device; PCI=percutaneous coronary intervention

**Figure S1(A). Propensity score density plots for MitraClip and non-MitraClip groups before (left) and after (right) matching.**

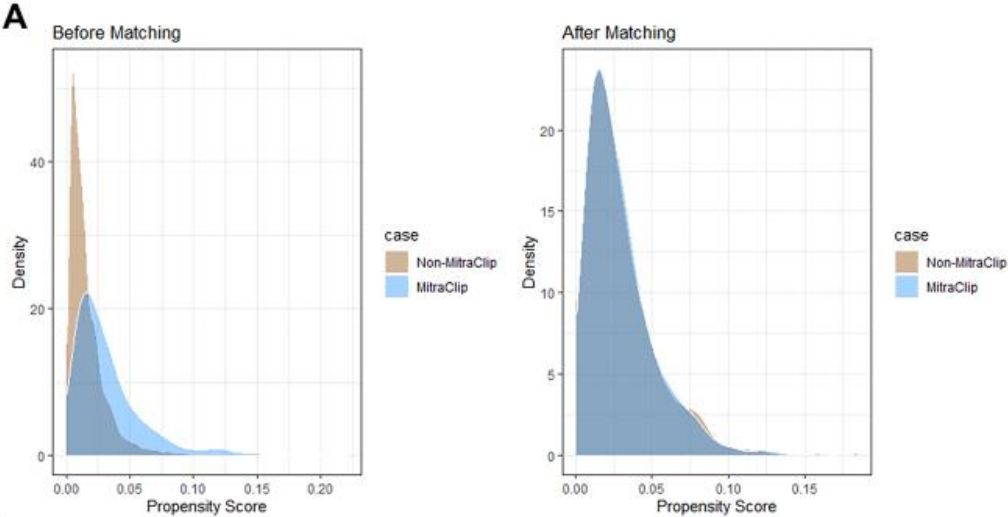

**Figure S1(B). Love plots showing covariate balance before (brown) and after (blue) matching.**

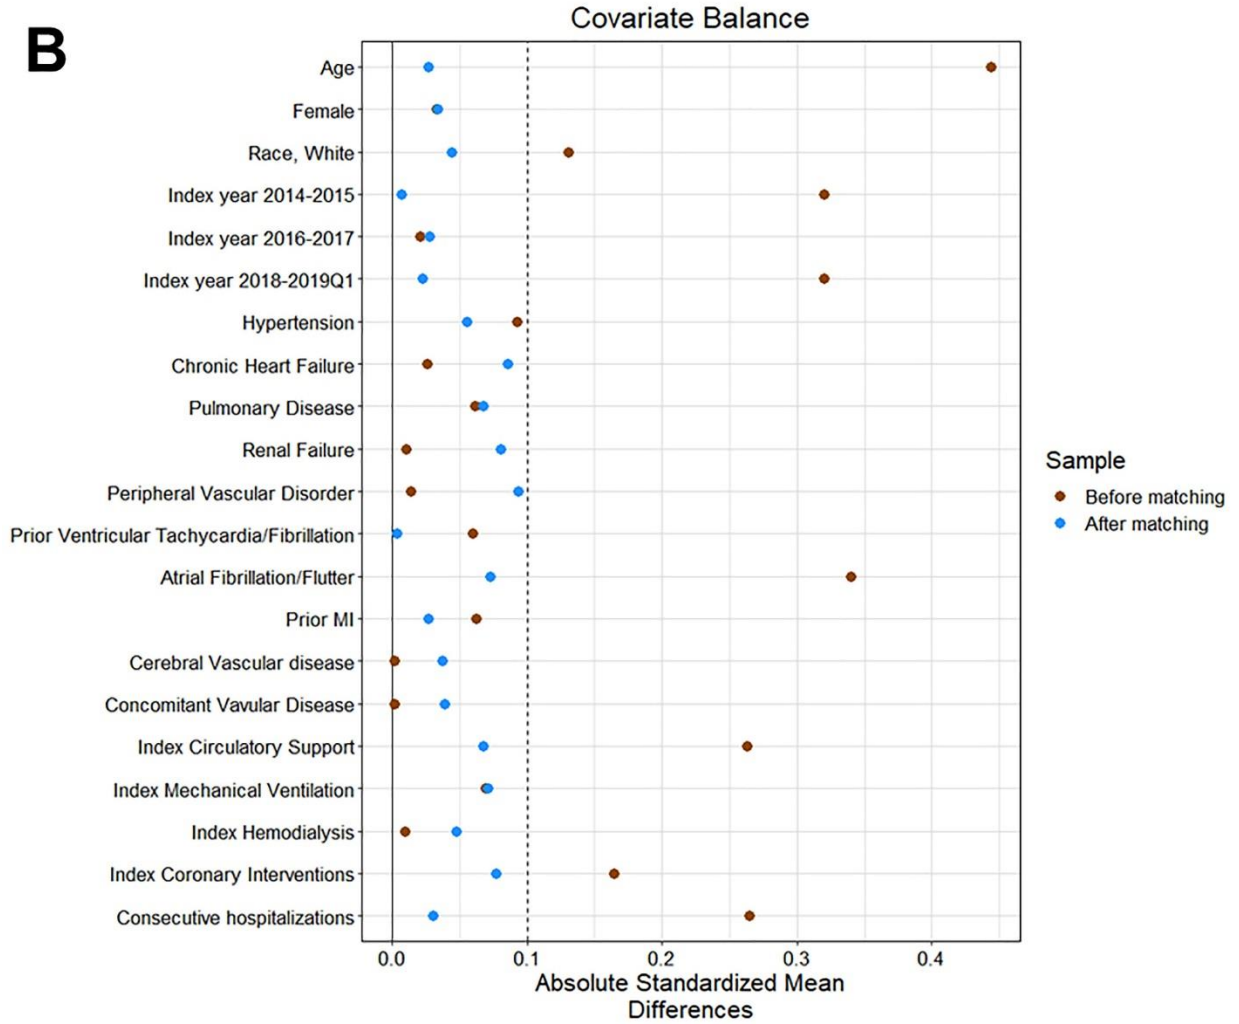

**Figure S2. Kaplan Meier Curve for composite endpoint of freedom from all-cause mortality, left ventricular assist device (LVAD) implant, or heart transplant.**

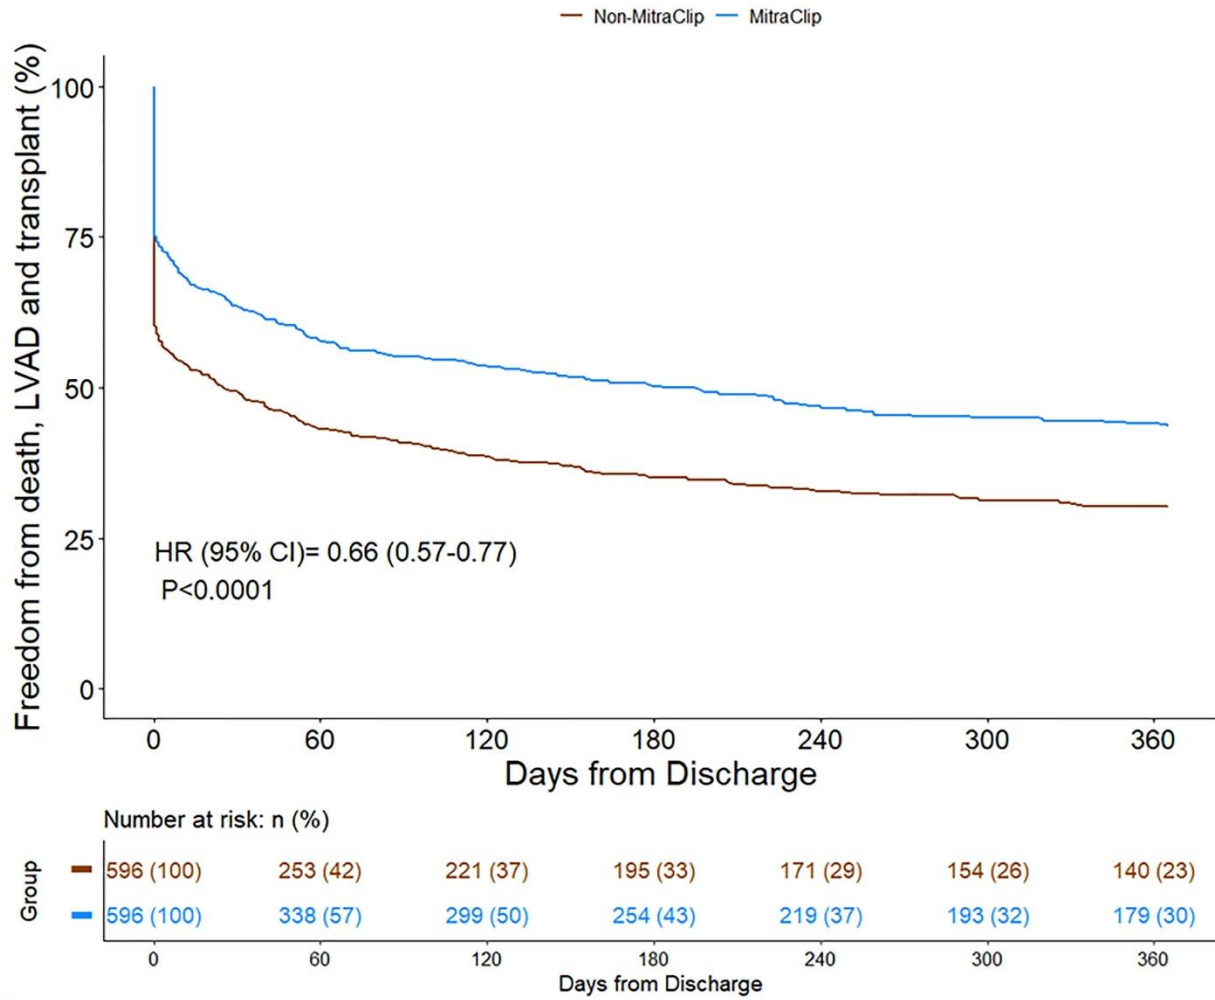



**Figure S3. Landmark analysis showing Kaplan Meier survival curve in patients with mitral regurgitation and cardiogenic shock who were discharged live from index hospitalization.**

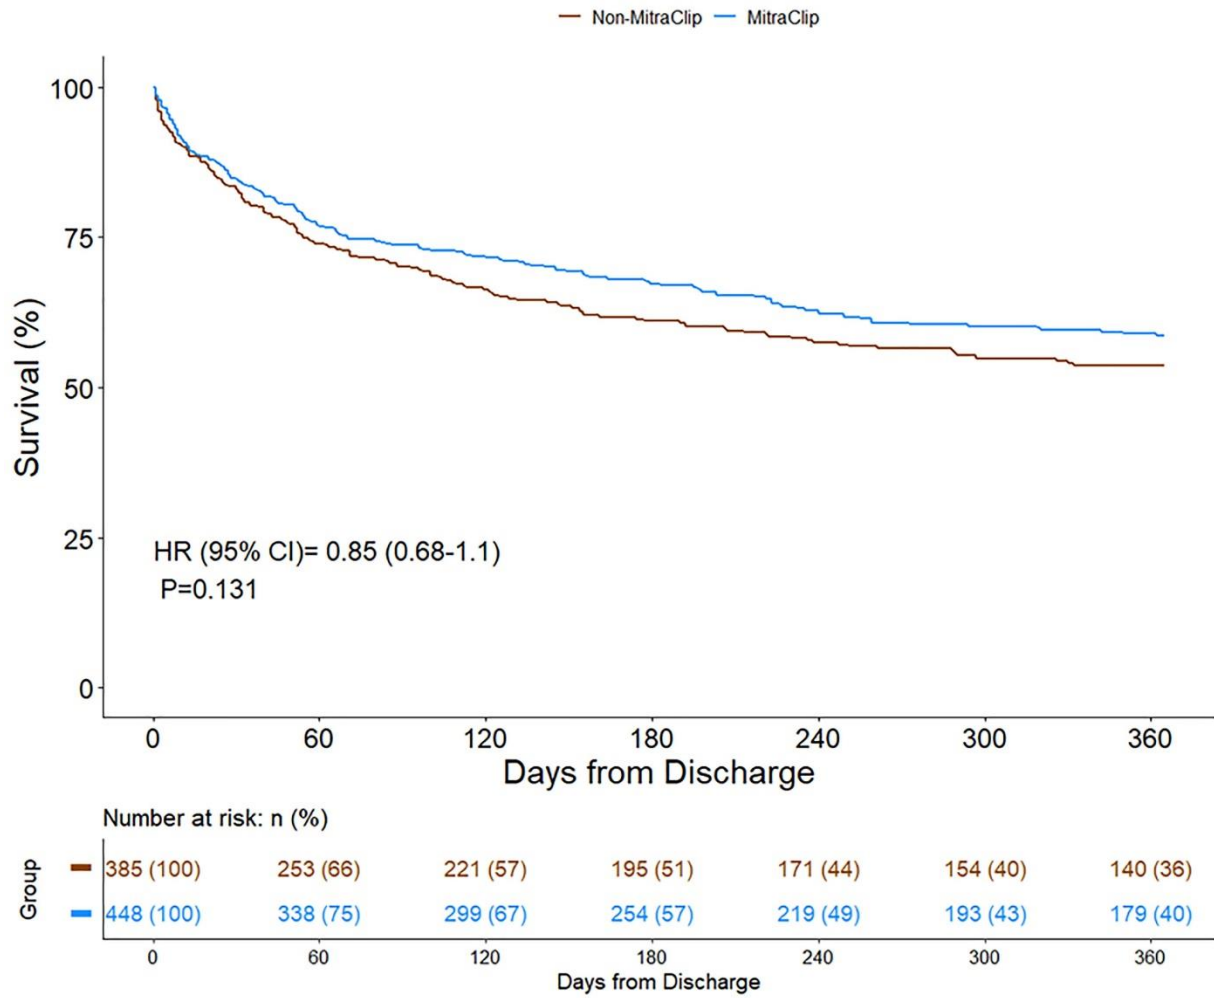

Supplement: JAH3-10-e019882-s001.pdf [file JAH3-10-e019882-s001.pdf]
